# Supplementary material for: Harnessing fold-to-wrinkle transition and hierarchical wrinkling on soft material surfaces by regulating substrate stiffness and sputtering flux
Source: Royal Society of Chemistry journal article supplement (doi:10.1039/c8sm01287c), 2018-01-01
Supplement: c8sm01287c1.pdf [file c8sm01287c1.pdf]

## Electronic Supplementary Information

### **Harnessing fold-to-wrinkle transition and hierarchical wrinkling on soft material surfaces by regulating substrate stiffness and sputtering flux**

Senjiang Yu,<sup>\*a</sup> Yadong Sun,<sup>a</sup> Shichen Li,<sup>b</sup> and Yong Ni<sup>\*b</sup>

<sup>a</sup> *Innovative Center for Advanced Materials (ICAM), Hangzhou Dianzi University,  
Hangzhou 310012, P.R. China*

<sup>b</sup> *Department of Modern Mechanics, CAS Key Laboratory of Mechanical Behavior  
and Design of Materials, University of Science and Technology of China, Hefei,  
Anhui 230026, P.R. China*

**Corresponding authors:** Senjiang Yu (senjiangyu@hotmail.com);

Yong Ni (yni@ustc.edu.cn)

*Figures and captions*

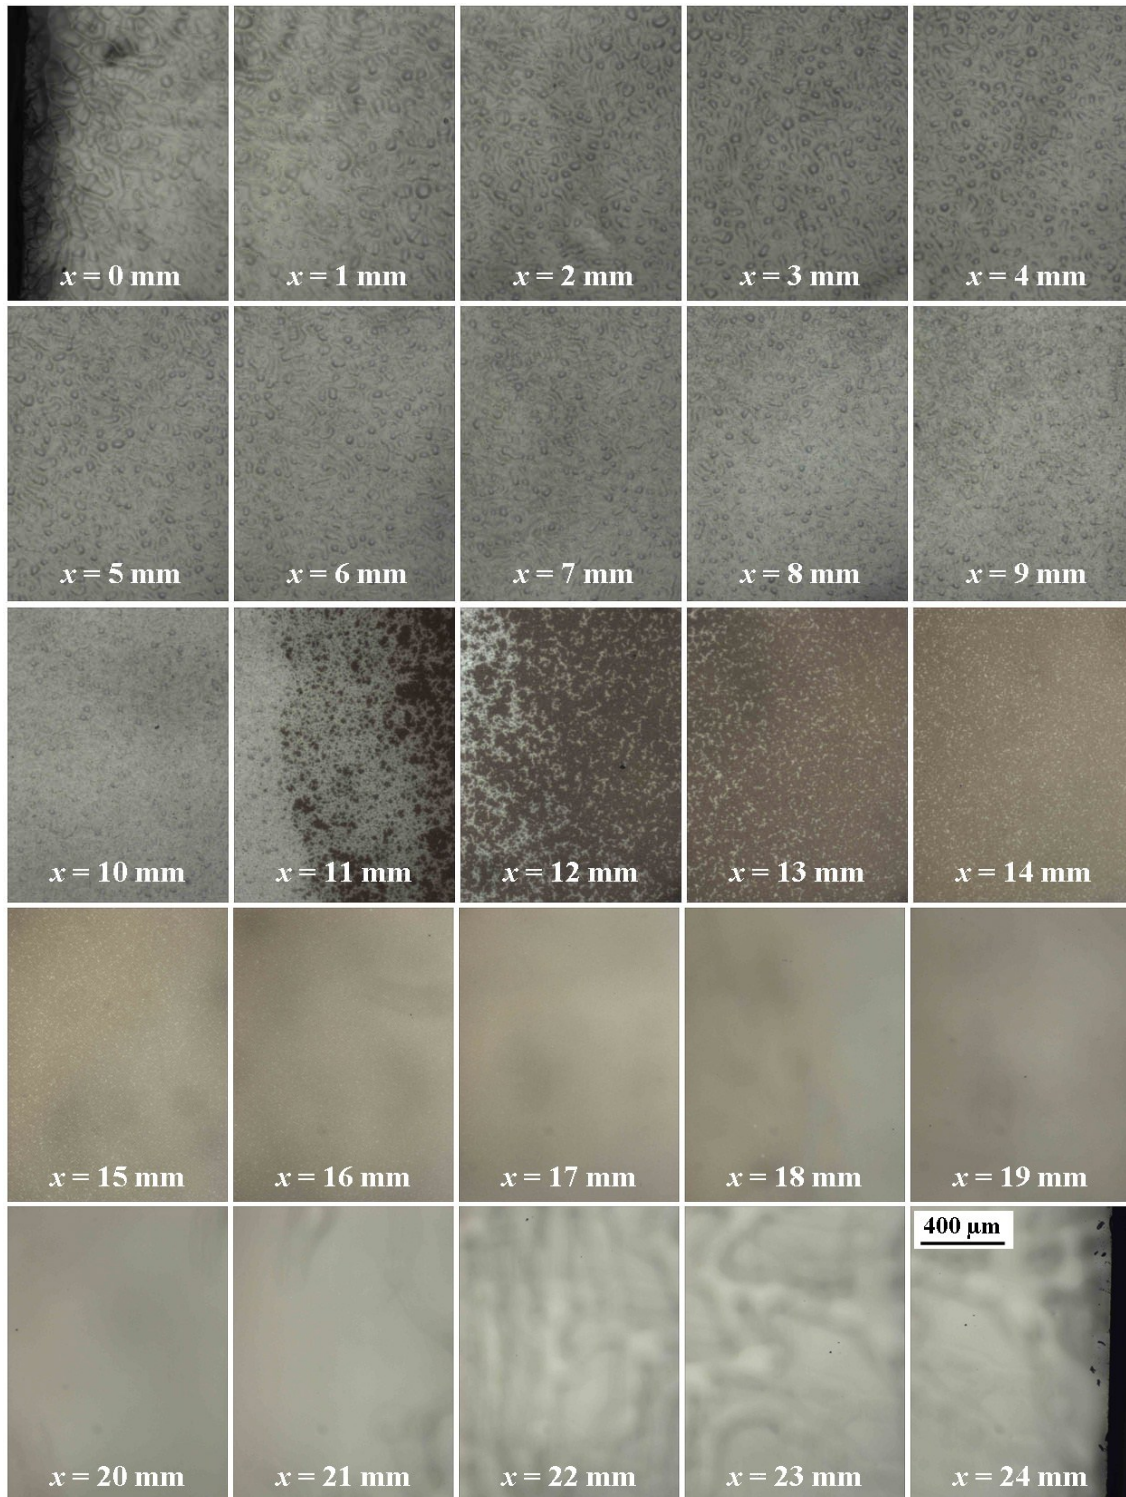

**Figure S1.** Morphological evolution of the gradient crosslinking PDMS surface with the sputtering time  $t = 4$  sec taken by the optical microscopy ( $\times 50$ ). The distance interval between the neighboring images is 1 mm. All images have the same size of  $1044 \times 1390 \mu\text{m}^2$ . From  $x = 11$  to 14 mm, folds transit to wrinkles gradually.

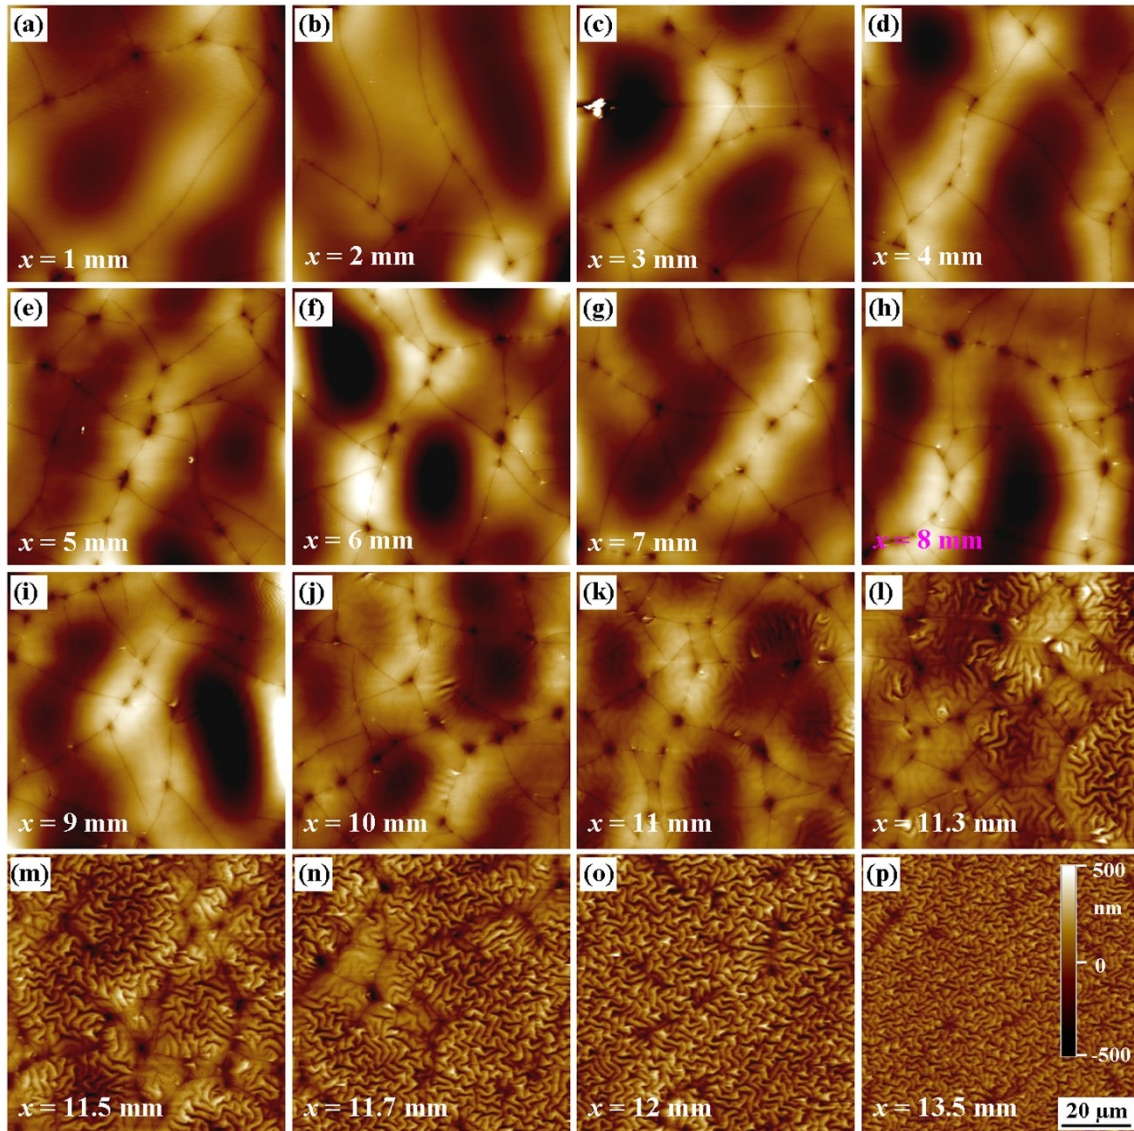

**Figure S2.** (a-p) Morphological evolution of the gradient crosslinking PDMS surface with  $t = 4$  sec in the fold-dominated region taken by the atom force microscopy (AFM). The data appearing in the bottom-left corners represent the distance  $x$ . All images have the same size of  $80 \times 80 \mu\text{m}^2$ . The scale bar in (p) is applied to all the AFM images. (corresponding to Fig. 2 in main text)

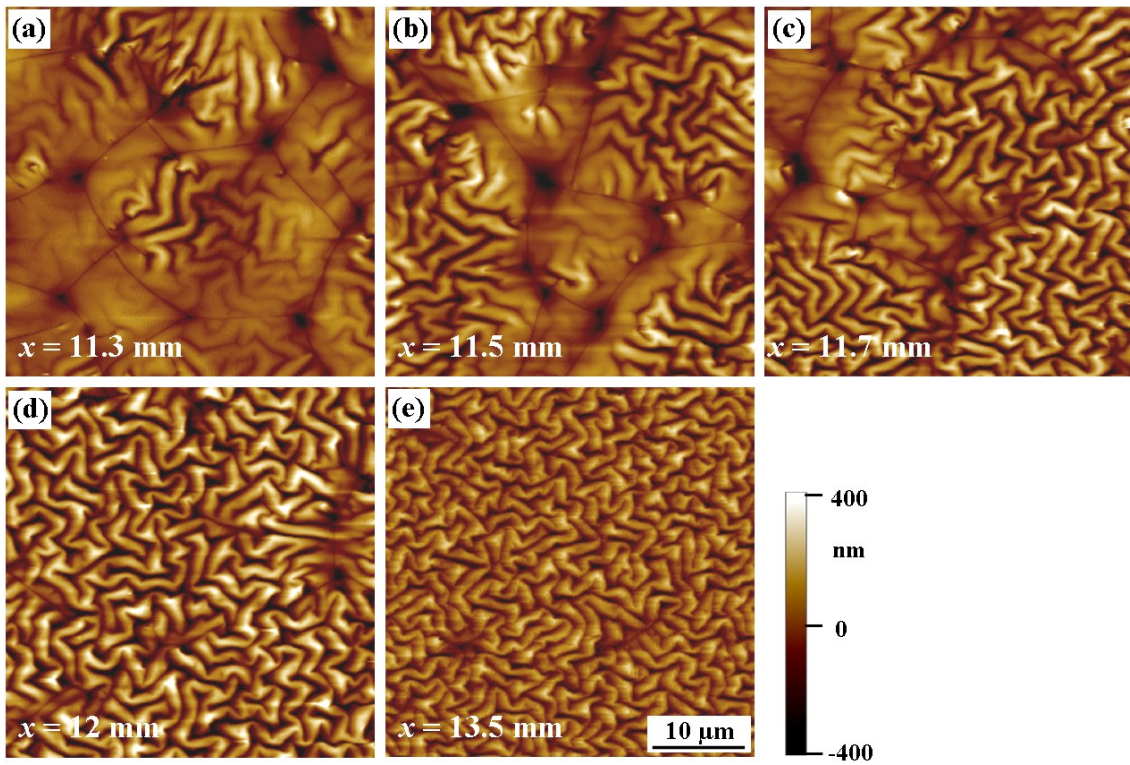

**Figure S3.** (a-e) Detailed transition from folds to wrinkles taken by the AFM. The sputtering time  $t = 4$  sec. All images have the same size of  $40 \times 40 \mu\text{m}^2$ . The scale bar is applied to all the AFM images. (corresponding to Fig. 4 in main text)

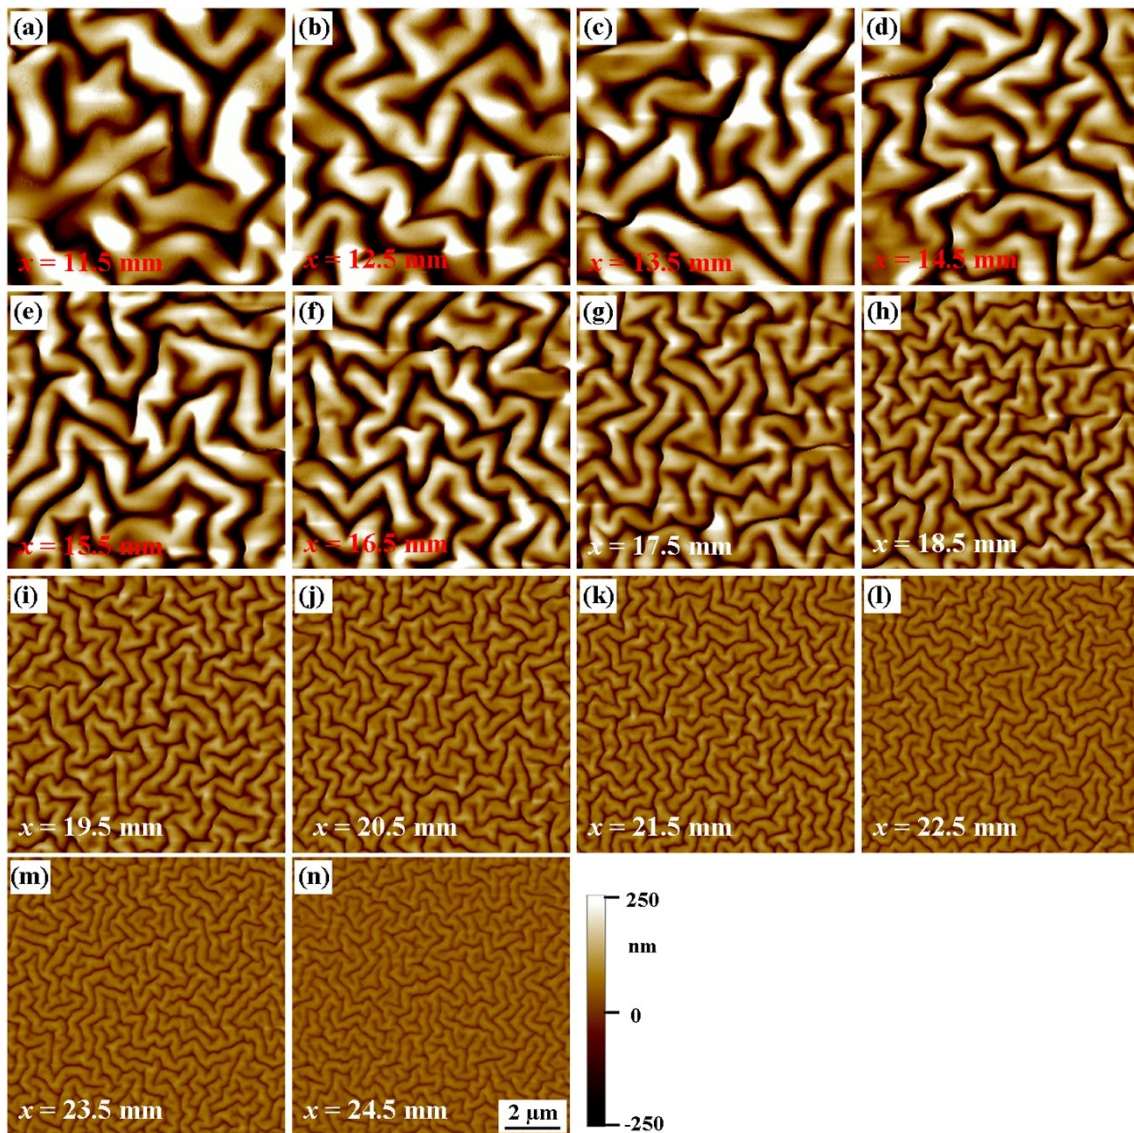

**Figure S4.** (a-n) Morphological evolution of the gradient crosslinking PDMS surface with the sputtering time  $t = 4$  sec in the wrinkle-dominant region taken by the AFM. All images have the same size of  $10 \times 10 \mu\text{m}^2$ . The scale bar is applied to all the AFM images. (corresponding to Fig. 5 in main text)

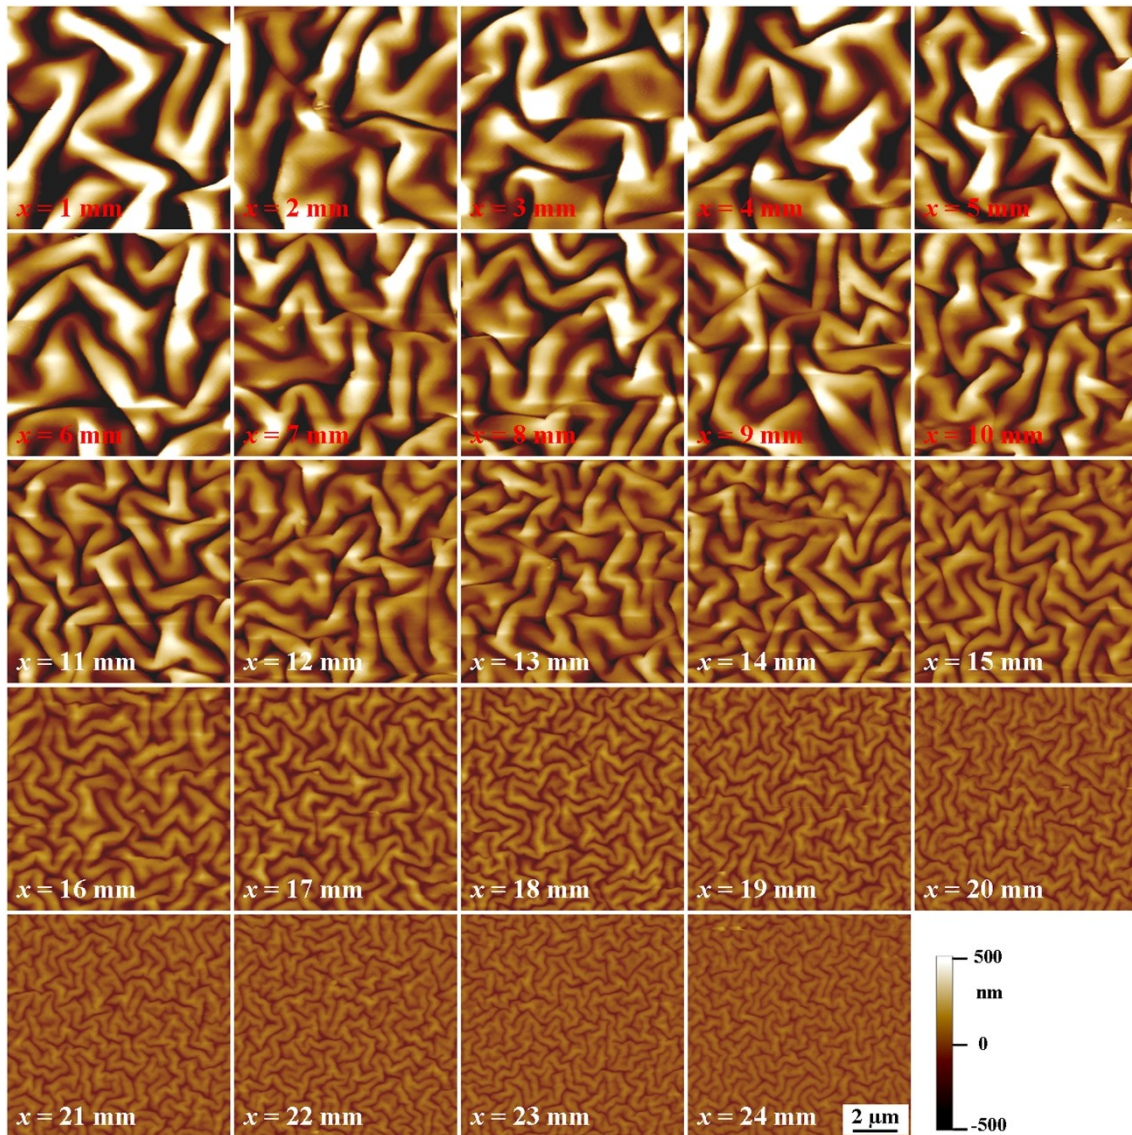

**Figure S5.** Morphological evolution of the gradient crosslinking PDMS surface with the sputtering time  $t = 7$  sec taken by the AFM. The distance interval between the neighboring images is 1 mm. All images have the same size of  $10 \times 10 \mu\text{m}^2$ . The scale bar is applied to all the AFM images. Note that the wrinkles have spread all over the PDMS surface and only a few isolated folds can be observed in the vicinity of the left edge for this sample. (corresponding to the first row of Fig. 7 in main text)

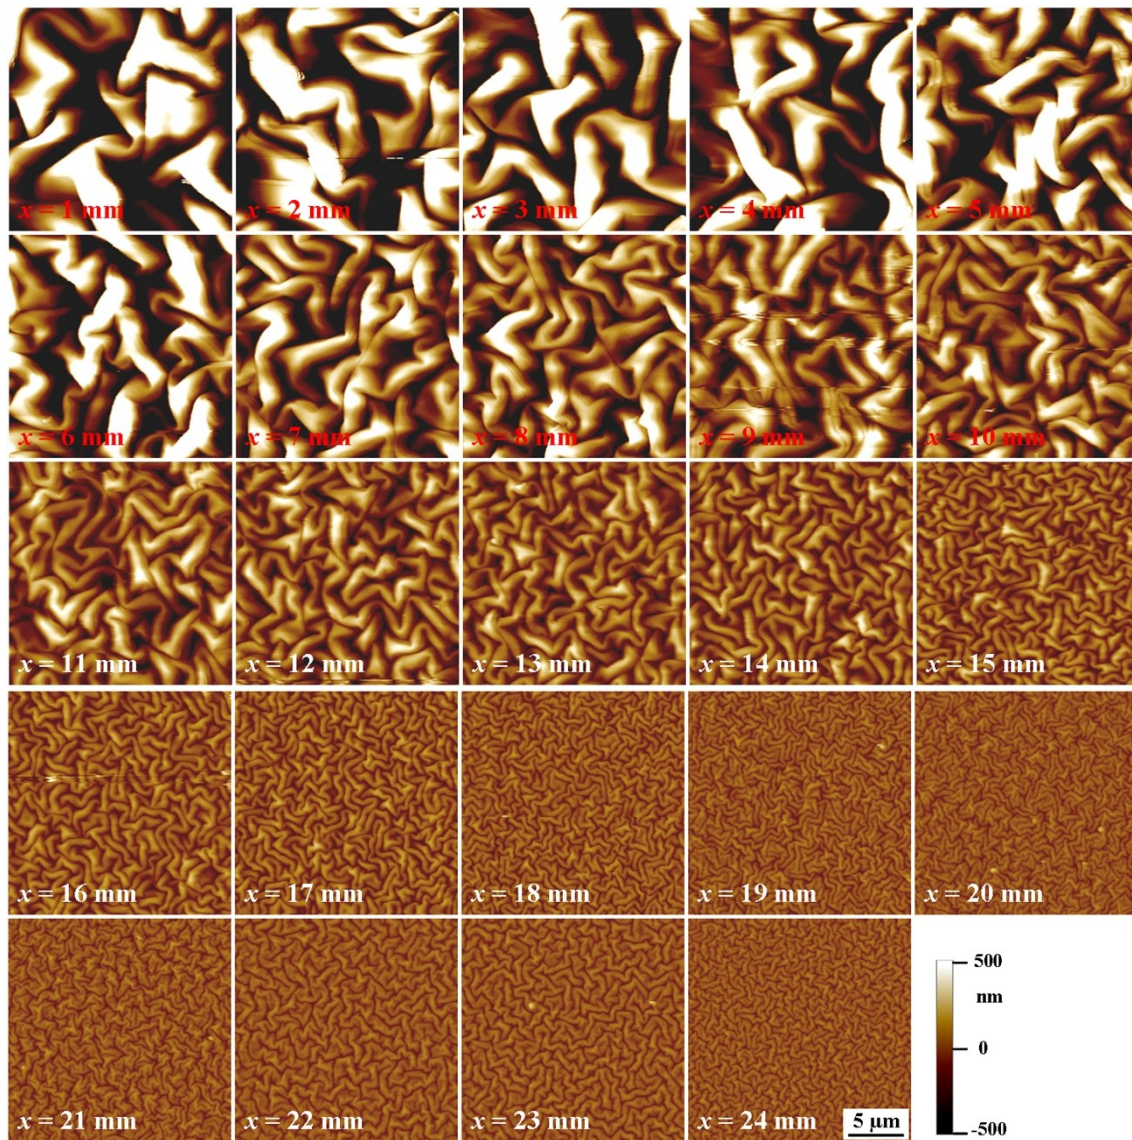

**Figure S6.** Morphological evolution of the gradient crosslinking PDMS surface with the sputtering time  $t = 11$  sec taken by the AFM. The distance interval between the neighboring images is 1 mm. All images have the same size of  $20 \times 20 \mu\text{m}^2$ . The scale bar is applied to all the AFM images. Note that in the range of  $x = 20 \sim 22$  mm, a hierarchical wrinkle pattern composed of G1 and G2 wrinkling can be observed. (corresponding to the second row of Fig. 7 in main text)

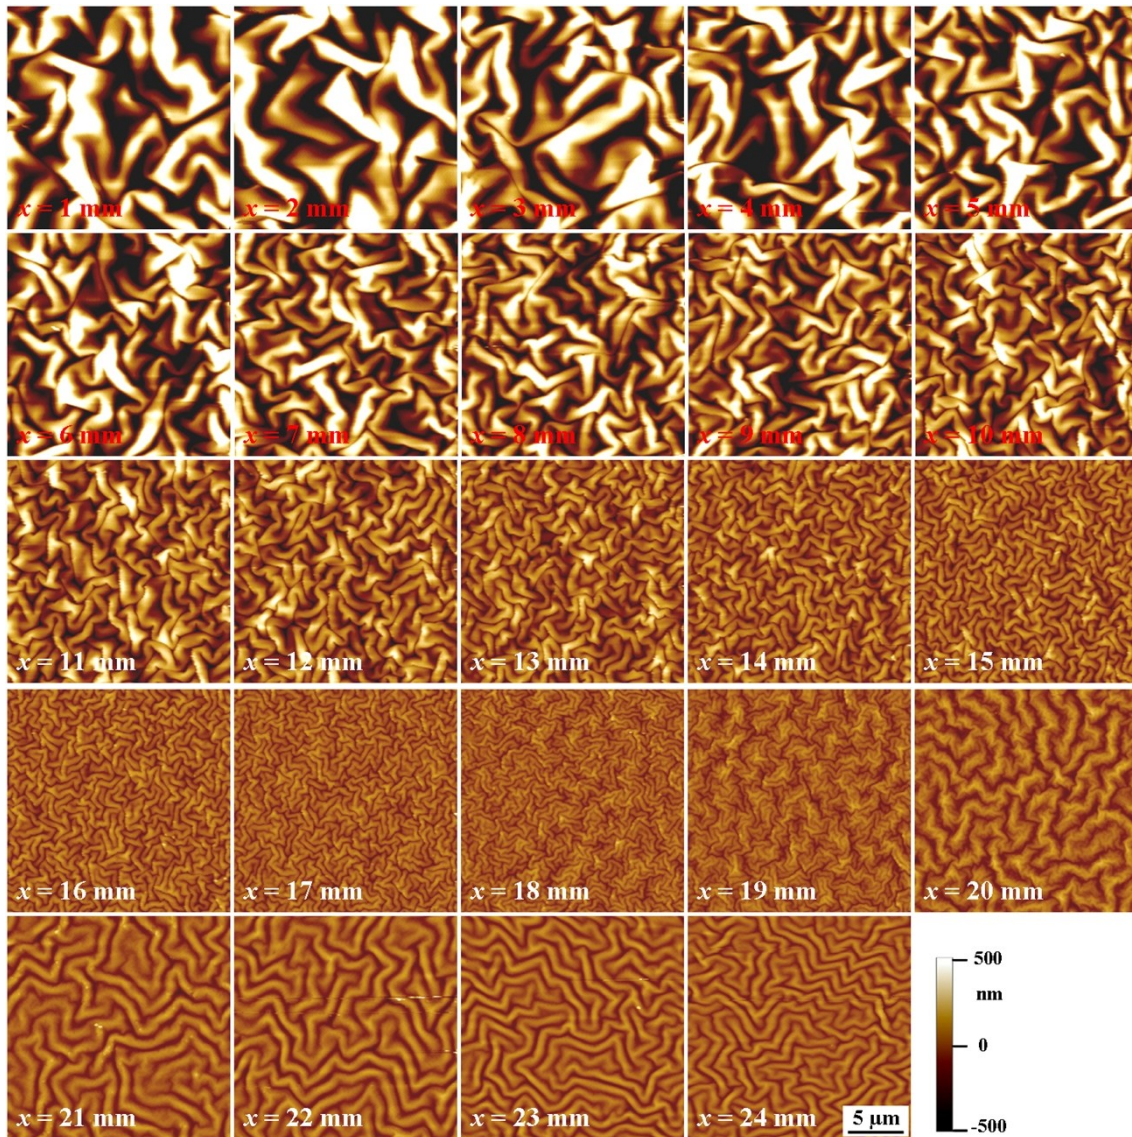

**Figure S7.** Morphological evolution of the gradient crosslinking PDMS surface with the sputtering time  $t = 20$  sec taken by the AFM. The distance interval between the neighboring images is 1 mm. All images have the same size of  $20 \times 20 \mu\text{m}^2$ . The scale bar is applied to all the AFM images. Note that in the range of  $x = 18 \sim 20$  mm, the hierarchical wrinkles can be observed. (corresponding to the third row of Fig. 7 in main text)



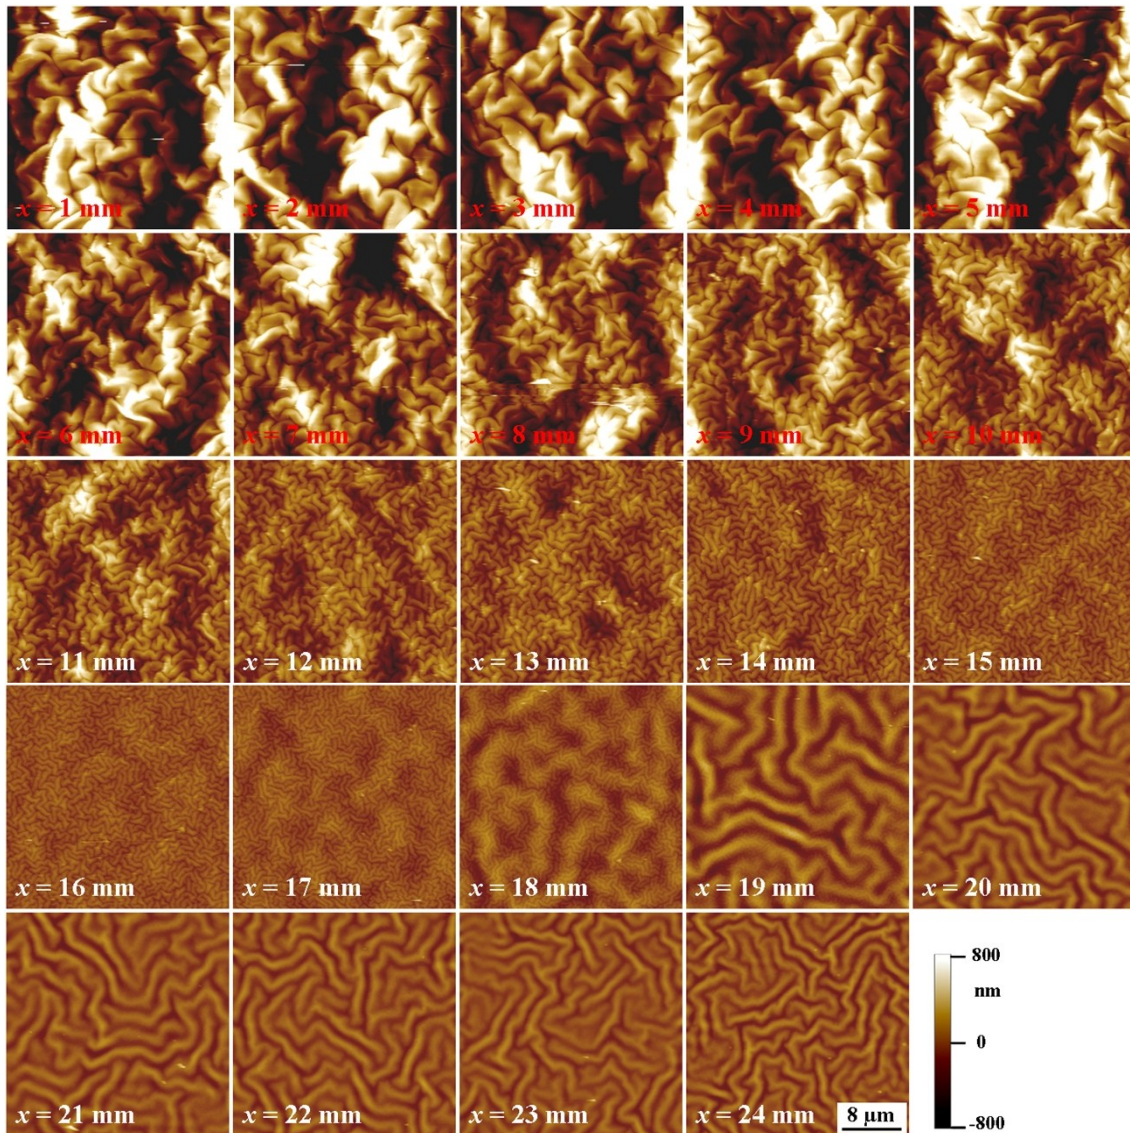

**Figure S8.** Morphological evolution of the gradient crosslinking PDMS surface with the sputtering time  $t = 60$  sec taken by the AFM. The distance interval between the neighboring images is 1 mm. All images have the same size of  $30 \times 30 \mu\text{m}^2$ . The scale bar is applied to all the AFM images. Note that in the range of  $x = 16 \sim 19$  mm, the hierarchical wrinkles can be observed. (corresponding to the fourth row of Fig. 7 in main text)

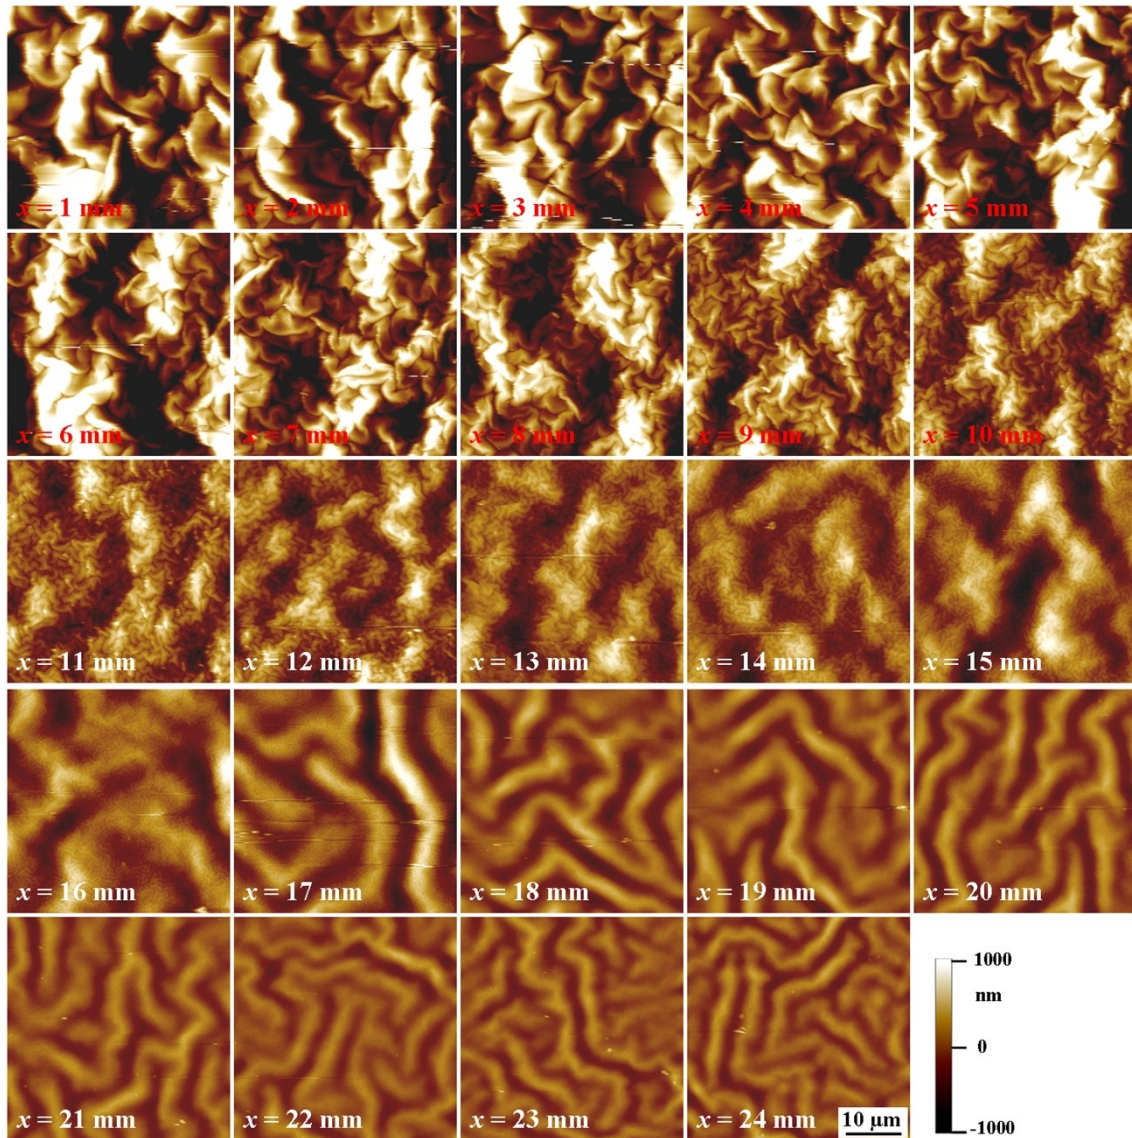

**Figure S9.** Morphological evolution of the gradient crosslinking PDMS surface with the sputtering time  $t = 180$  sec taken by the AFM. The distance interval between the neighboring images is 1 mm. All images have the same size of  $40 \times 40 \mu\text{m}^2$ . The scale bar is applied to all the AFM images. Note that in the range of  $x = 13 \sim 16$  mm, the hierarchical wrinkles can be observed. (corresponding to the last row of Fig. 7 in main text)

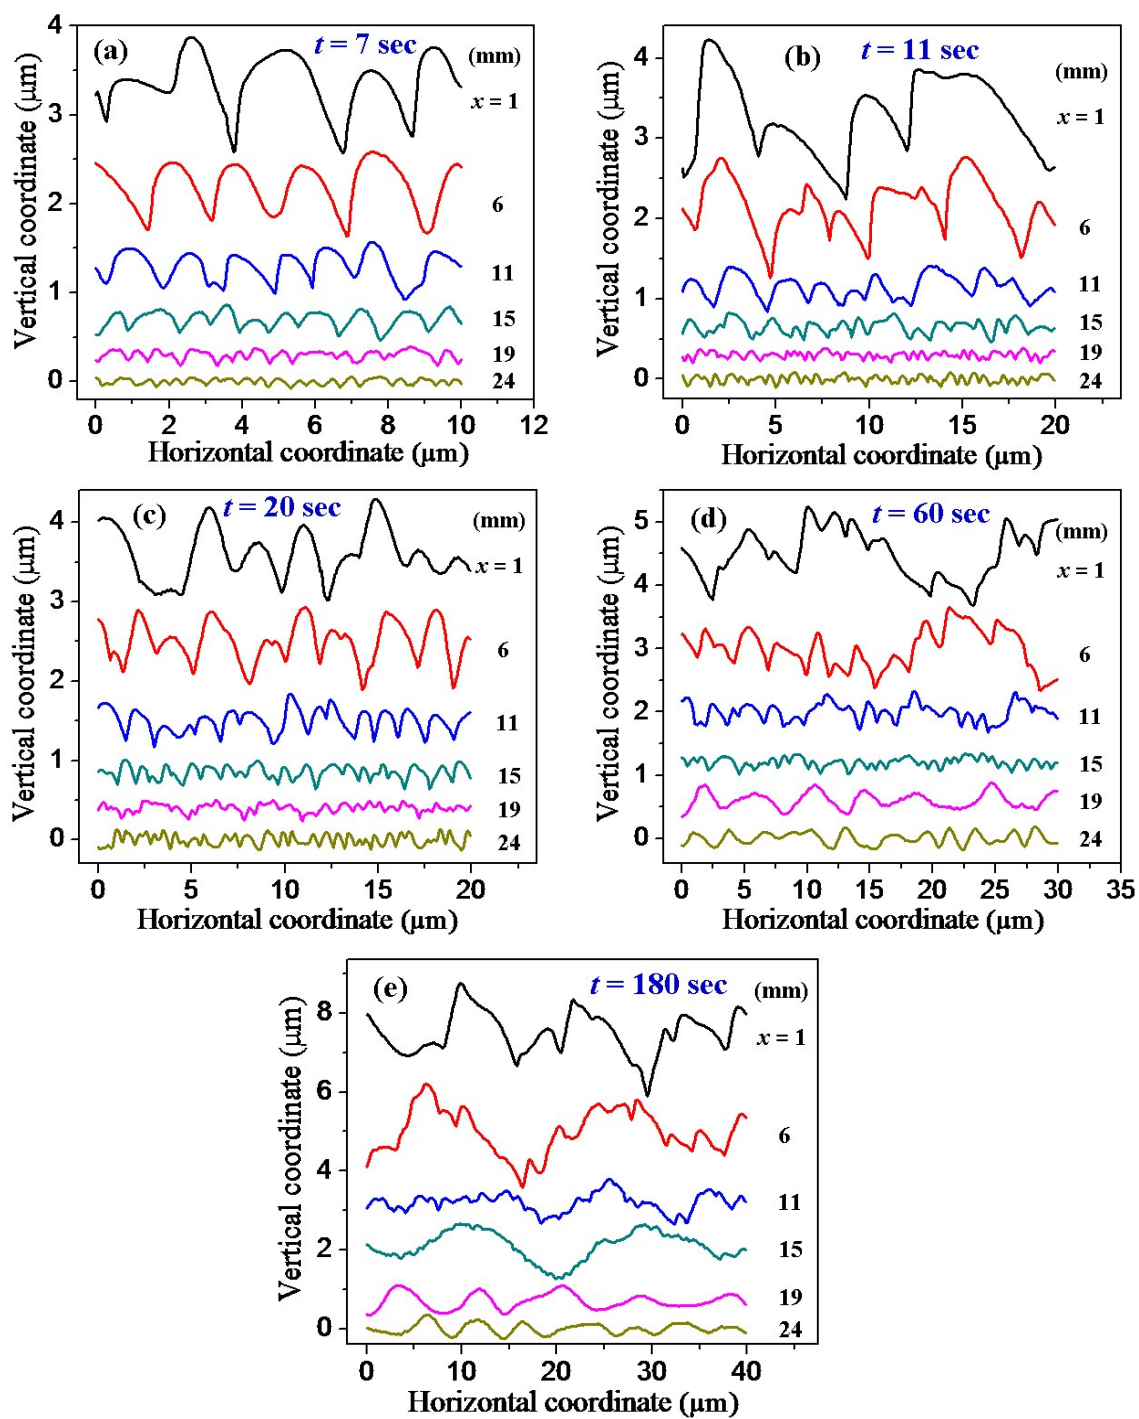

**Figure S10.** Comparisons of wrinkle profiles in the gradient crosslinking PDMS samples with varied sputtering times. (a)  $t = 7 \text{ sec}$ ; (b)  $t = 11 \text{ sec}$ ; (c)  $t = 20 \text{ sec}$ ; (d)  $t = 60 \text{ sec}$ ; (e)  $t = 180 \text{ sec}$ . The profile lines are shifted artificially along the vertical coordinate for clarity.

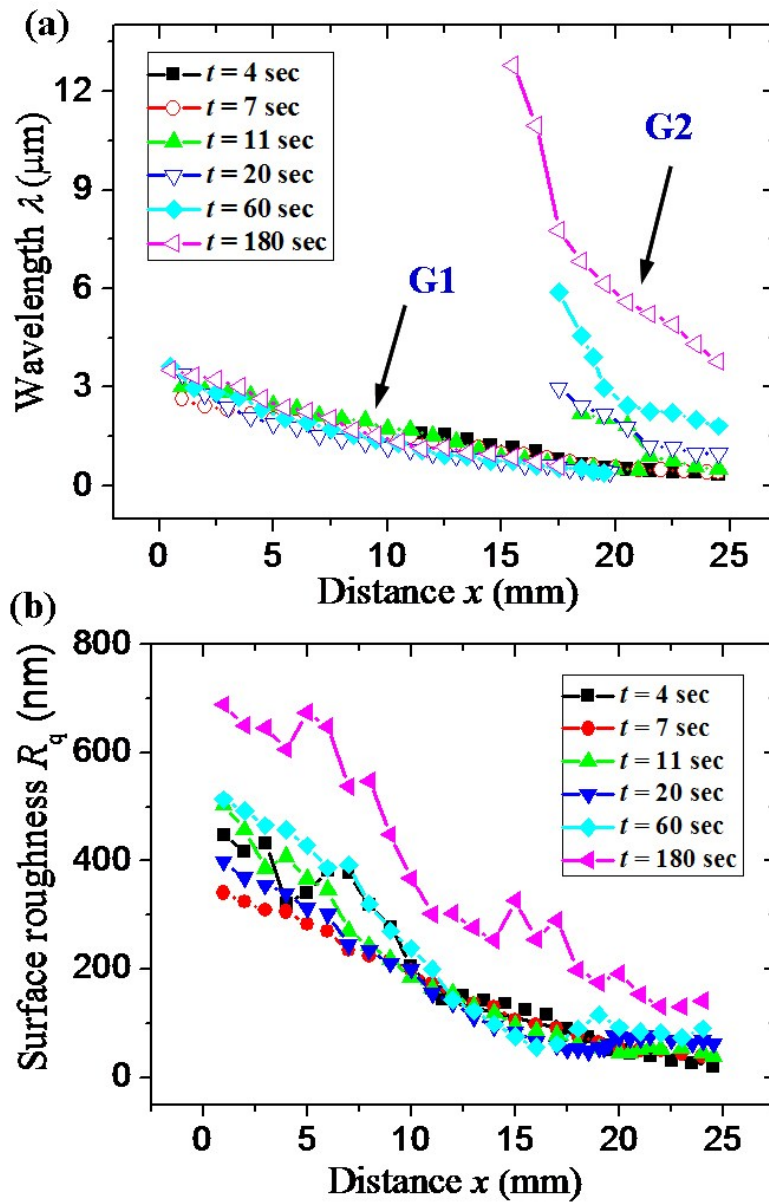

**Figure S11.** Evolutions of the wavelength  $\lambda$  of G1 and G2 wrinkles (a) and RMS surface roughness  $R_q$  (b) with the distance  $x$  for the gradient samples with varied sputtering times.

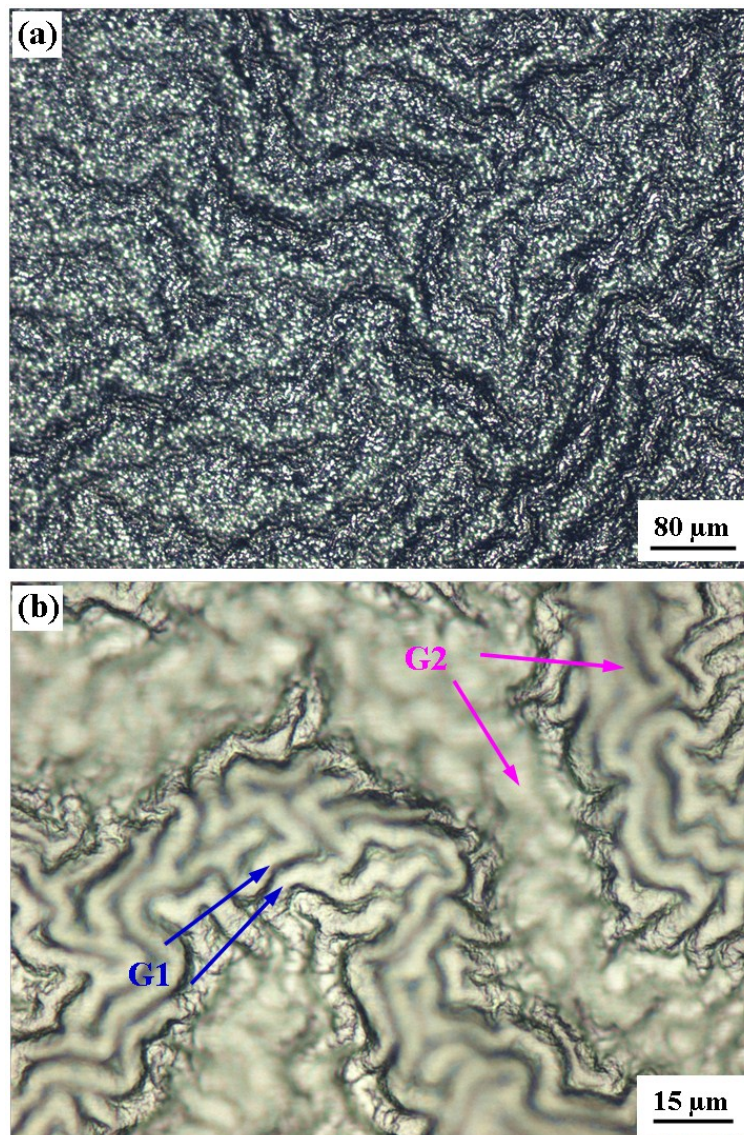

**Figure S12.** Typical hierarchical pattern composed of G1 and G2 wrinkles with different dimensions on the dielectric gel surface by sputtering of molybdenum atoms with  $t = 360$  sec. Optical micrographs with (a) low magnification ( $\times 100$ ) and (b) high magnification ( $\times 500$ ).
